# Supplementary material for: Red blood cells morphology and morphometry in adult, senior, and geriatricians dogs by optical and scanning electron microscopy
Source: Frontiers journal article supplement (doi:10.3389/fvets.2022.998438), 2022-11-10
Supplement: Data_Sheet_2.PDF [file Data_Sheet_2.PDF]

## Medical history format (Appendix S2)

|                                                                                                                                                  |                        |                                   |                                                                                       |                                   |       |
|--------------------------------------------------------------------------------------------------------------------------------------------------|------------------------|-----------------------------------|---------------------------------------------------------------------------------------|-----------------------------------|-------|
| Number:                                                                                                                                          |                        |                                   | Date:                                                                                 |                                   |       |
| <b>OWNER INFORMATION</b>                                                                                                                         |                        |                                   |                                                                                       |                                   |       |
| Owner's name:                                                                                                                                    |                        |                                   |                                                                                       |                                   |       |
| Address:                                                                                                                                         |                        |                                   |                                                                                       |                                   |       |
| Phone:                                                                                                                                           |                        |                                   |                                                                                       |                                   |       |
| Mail:                                                                                                                                            |                        |                                   |                                                                                       |                                   |       |
| <b>PATIENT'S DATA</b>                                                                                                                            |                        |                                   |                                                                                       |                                   |       |
| Name:                                                                                                                                            | Date of birth and age: | Sex: H/M                          | Breed:                                                                                | Weigh:                            | Size: |
| Particular signs:                                                                                                                                |                        |                                   |                                                                                       |                                   |       |
| Vaccination: yes / no<br>Date:                                                                                                                   |                        | Deparasitation: yes / no<br>Date: |                                                                                       | Is your dog spayed? yes / no      |       |
| Type of food                                                                                                                                     |                        | Fast: yes / no<br>8h 12h          |                                                                                       | Origin<br>rural / urban           |       |
| Anamnesis:                                                                                                                                       |                        |                                   |                                                                                       |                                   |       |
| T°                                                                                                                                               | Heart rate             | Pulse                             | Mucous                                                                                | Capillary fill time<br><i>seg</i> |       |
| Breathing frequency                                                                                                                              | Palmopercusión         | Tusigen reflex                    | Swallowing reflex                                                                     | Body condition                    |       |
| Hydration                                                                                                                                        | Lymphonodes            | Abdominal palpation               | Attitude                                                                              |                                   |       |
| Observations (eyes, ears, skin and annexes, locomotion, skeletal muscle, nervous, cardiovascular, respiratory, digestive, genitourinary system): |                        |                                   | 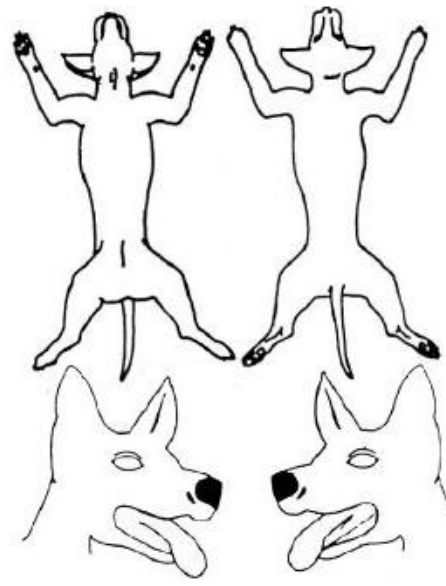 |                                   |       |
|                                                                                                                                                  |                        |                                   |                                                                                       |                                   |       |
| Previous illnesses or procedures:                                                                                                                |                        |                                   |                                                                                       |                                   |       |
